# Supplementary material for: PCR Biases Distort Bacterial and Archaeal Community Structure in Pyrosequencing Datasets
Source: PubMed Central journal article supplement (PMC3419673; doi:10.1371/journal.pone.0043093), 2012-08-15
Supplement: pone.0043093.s006.pdf [file pone.0043093.s006.pdf]

**Table S2:** The detection of bacterial sequences in environmental samples at resolution down to the order level. The classification was conducted on quality filtered and chimera free sequence libraries for each sample. Green boxes indicate sequence classes that were detected.

| Classification               | ANBR | DWDS | MGCT | SW | GC | OP-YNP |
|------------------------------|------|------|------|----|----|--------|
| <b>Acidobacteria</b>         |      |      |      |    |    |        |
| Acidobacteria_Gp21           |      |      |      |    |    |        |
| Acidobacteria_Gp3            |      |      |      |    |    |        |
| Acidobacteria_Gp4            |      |      |      |    |    |        |
| Acidobacteria_Gp6            |      |      |      |    |    |        |
| Acidobacteria_Gp7            |      |      |      |    |    |        |
| Holophagae                   |      |      |      |    |    |        |
| Holophagales                 |      |      |      |    |    |        |
| unclassified                 |      |      |      |    |    |        |
| <b>Actinobacteria</b>        |      |      |      |    |    |        |
| Actinobacteria               |      |      |      |    |    |        |
| Acidimicrobidae              |      |      |      |    |    |        |
| Actinobacteridae             |      |      |      |    |    |        |
| Coriobacteridae              |      |      |      |    |    |        |
| Rubrobacteridae              |      |      |      |    |    |        |
| unclassified                 |      |      |      |    |    |        |
| <b>Aquificae</b>             |      |      |      |    |    |        |
| Aquificae                    |      |      |      |    |    |        |
| Aquificales                  |      |      |      |    |    |        |
| <b>Bacteroidetes</b>         |      |      |      |    |    |        |
| Bacteroidetes_incertae_sedis |      |      |      |    |    |        |
| Fulvivirga                   |      |      |      |    |    |        |
| unclassified                 |      |      |      |    |    |        |
| Bacteroidia                  |      |      |      |    |    |        |
| Bacteroidales                |      |      |      |    |    |        |
| Flavobacteria                |      |      |      |    |    |        |
| Flavobacteriales             |      |      |      |    |    |        |
| Sphingobacteria              |      |      |      |    |    |        |
| Sphingobacteriales           |      |      |      |    |    |        |
| unclassified                 |      |      |      |    |    |        |
| unclassified_Bacteroidetes   |      |      |      |    |    |        |
| <b>Caldiserica</b>           |      |      |      |    |    |        |
| Caldisericia                 |      |      |      |    |    |        |
| Caldisericales               |      |      |      |    |    |        |
| <b>Chlamydiae</b>            |      |      |      |    |    |        |
| Chlamydiae                   |      |      |      |    |    |        |
| Chlamydiales                 |      |      |      |    |    |        |
| <b>Chloroflexi</b>           |      |      |      |    |    |        |
| Anaerolineae                 |      |      |      |    |    |        |
| Anaerolineales               |      |      |      |    |    |        |
| Caldilineae                  |      |      |      |    |    |        |

|  |                            |  |  |  |  |  |  |
|--|----------------------------|--|--|--|--|--|--|
|  | Caldilineales              |  |  |  |  |  |  |
|  | Chloroflexi                |  |  |  |  |  |  |
|  | Chloroflexales             |  |  |  |  |  |  |
|  | unclassified               |  |  |  |  |  |  |
|  | unclassified_Chloroflexi   |  |  |  |  |  |  |
|  | <b>Chrysiogenetes</b>      |  |  |  |  |  |  |
|  | Chrysiogenetes             |  |  |  |  |  |  |
|  | Chrysiogenales             |  |  |  |  |  |  |
|  | <b>Cyanobacteria</b>       |  |  |  |  |  |  |
|  | Cyanobacteria              |  |  |  |  |  |  |
|  | Chloroplast                |  |  |  |  |  |  |
|  | Family_II                  |  |  |  |  |  |  |
|  | Family_XI                  |  |  |  |  |  |  |
|  | <b>Deinococcus-Thermus</b> |  |  |  |  |  |  |
|  | Deinococci                 |  |  |  |  |  |  |
|  | Thermales                  |  |  |  |  |  |  |
|  | <b>Firmicutes</b>          |  |  |  |  |  |  |
|  | Bacilli                    |  |  |  |  |  |  |
|  | Bacillales                 |  |  |  |  |  |  |
|  | Lactobacillales            |  |  |  |  |  |  |
|  | Clostridia                 |  |  |  |  |  |  |
|  | Clostridiales              |  |  |  |  |  |  |
|  | Thermoanaerobacterales     |  |  |  |  |  |  |
|  | unclassified_Clostridia    |  |  |  |  |  |  |
|  | Erysipelotrichi            |  |  |  |  |  |  |
|  | Erysipelotrichales         |  |  |  |  |  |  |
|  | unclassified               |  |  |  |  |  |  |
|  | unclassified_Firmicutes    |  |  |  |  |  |  |
|  | <b>Fusobacteria</b>        |  |  |  |  |  |  |
|  | Fusobacteria               |  |  |  |  |  |  |
|  | Fusobacteriales            |  |  |  |  |  |  |
|  | <b>Gemmatimonadetes</b>    |  |  |  |  |  |  |
|  | Gemmatimonadetes           |  |  |  |  |  |  |
|  | Gemmatimonadales           |  |  |  |  |  |  |
|  | <b>Lentisphaerae</b>       |  |  |  |  |  |  |
|  | Lentisphaeria              |  |  |  |  |  |  |
|  | Victivallales              |  |  |  |  |  |  |
|  | unclassified_Lentisphaeria |  |  |  |  |  |  |
|  | <b>Nitrospira</b>          |  |  |  |  |  |  |
|  | Nitrospira                 |  |  |  |  |  |  |
|  | Nitrospirales              |  |  |  |  |  |  |
|  | <b>OD1</b>                 |  |  |  |  |  |  |
|  | OD1_genera_incertae_sedis  |  |  |  |  |  |  |
|  | <b>OP10</b>                |  |  |  |  |  |  |
|  | OP10_genera_incertae_sedis |  |  |  |  |  |  |
|  | <b>Planctomycetes</b>      |  |  |  |  |  |  |

|                                     |  |  |  |  |  |  |
|-------------------------------------|--|--|--|--|--|--|
| Planctomycetacia                    |  |  |  |  |  |  |
| Planctomycetales                    |  |  |  |  |  |  |
| <b>Proteobacteria</b>               |  |  |  |  |  |  |
| Alphaproteobacteria                 |  |  |  |  |  |  |
| Alphaproteobacteria_incertae_sedis  |  |  |  |  |  |  |
| Rhizobiales                         |  |  |  |  |  |  |
| Rhodobacterales                     |  |  |  |  |  |  |
| Rhodospirillales                    |  |  |  |  |  |  |
| Rickettsiales                       |  |  |  |  |  |  |
| Sphingomonadales                    |  |  |  |  |  |  |
| unclassified                        |  |  |  |  |  |  |
| unclassified_Alphaproteobacteria    |  |  |  |  |  |  |
| Betaproteobacteria                  |  |  |  |  |  |  |
| Burkholderiales                     |  |  |  |  |  |  |
| Hydrogenophilales                   |  |  |  |  |  |  |
| Methylophilales                     |  |  |  |  |  |  |
| Neisseriales                        |  |  |  |  |  |  |
| Nitrosomonadales                    |  |  |  |  |  |  |
| unclassified                        |  |  |  |  |  |  |
| unclassified_Betaproteobacteria     |  |  |  |  |  |  |
| Deltaproteobacteria                 |  |  |  |  |  |  |
| Bdellovibrionales                   |  |  |  |  |  |  |
| Desulfobacterales                   |  |  |  |  |  |  |
| Desulfovibrionales                  |  |  |  |  |  |  |
| Desulfurellales                     |  |  |  |  |  |  |
| Desulfuromonadales                  |  |  |  |  |  |  |
| Myxococcales                        |  |  |  |  |  |  |
| Syntrophobacterales                 |  |  |  |  |  |  |
| Syntrophorhabdaceae                 |  |  |  |  |  |  |
| unclassified                        |  |  |  |  |  |  |
| unclassified_Deltaproteobacteria    |  |  |  |  |  |  |
| Epsilonproteobacteria               |  |  |  |  |  |  |
| Campylobacterales                   |  |  |  |  |  |  |
| unclassified                        |  |  |  |  |  |  |
| Gammaaproteobacteria                |  |  |  |  |  |  |
| Alteromonadales                     |  |  |  |  |  |  |
| Chromatiales                        |  |  |  |  |  |  |
| Enterobacterales                    |  |  |  |  |  |  |
| Gammaaproteobacteria_incertae_sedis |  |  |  |  |  |  |
| Legionellales                       |  |  |  |  |  |  |
| Methylococcales                     |  |  |  |  |  |  |
| Oceanospirillales                   |  |  |  |  |  |  |
| Pseudomonadales                     |  |  |  |  |  |  |
| Thiotrichales                       |  |  |  |  |  |  |
| Xanthomonadales                     |  |  |  |  |  |  |
| unclassified                        |  |  |  |  |  |  |
| unclassified_Gammaaproteobacteria   |  |  |  |  |  |  |

|                                      |  |  |  |  |  |  |
|--------------------------------------|--|--|--|--|--|--|
| unclassified                         |  |  |  |  |  |  |
| unclassified_Proteobacteria          |  |  |  |  |  |  |
| <b>Spirochaetes</b>                  |  |  |  |  |  |  |
| Spirochaetes                         |  |  |  |  |  |  |
| Spirochaetales                       |  |  |  |  |  |  |
| Synergistales                        |  |  |  |  |  |  |
| Acholeplasmatales                    |  |  |  |  |  |  |
| unclassified_Mollicutes              |  |  |  |  |  |  |
| <b>Verrucomicrobia</b>               |  |  |  |  |  |  |
| Opitutae                             |  |  |  |  |  |  |
| Opitutales                           |  |  |  |  |  |  |
| Puniceococcales                      |  |  |  |  |  |  |
| unclassified                         |  |  |  |  |  |  |
| unclassified_Opitutae                |  |  |  |  |  |  |
| Spartobacteria                       |  |  |  |  |  |  |
| Spartobacteria_genera_incertae_sedis |  |  |  |  |  |  |
| Subdivision3                         |  |  |  |  |  |  |
| Subdivision3_genera_incertae_sedis   |  |  |  |  |  |  |
| Subdivision5                         |  |  |  |  |  |  |
| Subdivision5_genera_incertae_sedis   |  |  |  |  |  |  |
| Verrucomicrobiae                     |  |  |  |  |  |  |
| Verrucomicrobiales                   |  |  |  |  |  |  |
| unclassified                         |  |  |  |  |  |  |
| unclassified_Verrucomicrobia         |  |  |  |  |  |  |
| <b>WS3</b>                           |  |  |  |  |  |  |
| WS3_genera_incertae_sedis            |  |  |  |  |  |  |
| <b>unclassified</b>                  |  |  |  |  |  |  |
| <b>unclassified_Bacteria</b>         |  |  |  |  |  |  |
