# Supplementary material for: PCR Biases Distort Bacterial and Archaeal Community Structure in Pyrosequencing Datasets
Source: PubMed Central journal article supplement (PMC3419673; doi:10.1371/journal.pone.0043093), 2012-08-15
Supplement: pone.0043093.s007.pdf [file pone.0043093.s007.pdf]

**Table S3:** The detection of archaeal sequences in environmental samples at resolution down to the family level. The classification was conducted on quality filtered and chimera free sequence libraries for each sample. Green boxes indicate sequence classes that were detected.

| Classification          | ANBR | FAS | GC | OP-YNP |
|-------------------------|------|-----|----|--------|
| Crenarchaeota           |      |     |    |        |
| Thermoprotei            |      |     |    |        |
| Caldisphaerales         |      |     |    |        |
| Caldisphaeraceae        |      |     |    |        |
| Desulfurococcales       |      |     |    |        |
| Desulfurococcaceae      |      |     |    |        |
| Sulfolobales            |      |     |    |        |
| Sulfolobaceae           |      |     |    |        |
| Thermoproteales         |      |     |    |        |
| Thermoproteaceae        |      |     |    |        |
| unclassified            |      |     |    |        |
| env_sample              |      |     |    |        |
| Euryarchaeota           |      |     |    |        |
| Archaeoglobi            |      |     |    |        |
| Archaeoglobales         |      |     |    |        |
| Archaeoglobaceae        |      |     |    |        |
| Marine_Group_II         |      |     |    |        |
| env_sample              |      |     |    |        |
| Marine_Group_III        |      |     |    |        |
| env_sample              |      |     |    |        |
| Methanobacteria         |      |     |    |        |
| Methanobacteriales      |      |     |    |        |
| Methanobacteriaceae     |      |     |    |        |
| Methanomicrobia         |      |     |    |        |
| Methanomicrobiales      |      |     |    |        |
| Genera_incertae_sedis   |      |     |    |        |
| Methanospirillaceae     |      |     |    |        |
| Methanosarcinales       |      |     |    |        |
| Methanosaetaceae        |      |     |    |        |
| Methanosarcinaceae      |      |     |    |        |
| Thermoplasmata          |      |     |    |        |
| Thermoplasmatales       |      |     |    |        |
| Picrophilaceae          |      |     |    |        |
| Nanoarchaeota           |      |     |    |        |
| env_sample              |      |     |    |        |
| Thaumarchaeota          |      |     |    |        |
| marine_archaeal_group_1 |      |     |    |        |
| Nitrosopumilales        |      |     |    |        |
| Nitrosopumilaceae       |      |     |    |        |
| env_sample              |      |     |    |        |

env\_sample  
unclassified

|  |  |  |  |  |
|--|--|--|--|--|
|  |  |  |  |  |
|  |  |  |  |  |
