# Supplementary material for: PCR Biases Distort Bacterial and Archaeal Community Structure in Pyrosequencing Datasets
Source: PLoS One. 2012 Aug 15;7(8):e43093. doi: 10.1371/journal.pone.0043093 (PMC3419673; doi:10.1371/journal.pone.0043093)
Supplement: Table S1 — Sequence information for template specific bacterial and archaeal primers, multiplexing barcodes, and thermodynamic and secondary structure parameters. (A) Sequence information for the three bacterial forward primers, Bact-338F1, Bact-338F2, and Bact-338F3, and thermodynamic parameters for the primers when used in combination with Titanium fusion primer B. (B) Sequence information for the reverse bacterial primer Bact-909R and designed barcodes. Also provided are the thermodynamic parameters for the most stable hairpin, homo-dimer, and hetero-dimer interactions with the three forward primers. (C) Sequence information for the archaeal forward primer, Arch-340F, and thermodynamic parameters for the primer when used in combination with Titanium fusion primer B. (D) Sequence information for the reverse archaeal primer Arch-915R and designed barcodes. Also provided are the thermodynamic parameters for the most stable hairpin, homo-dimer, and hetero-dimer interactions with the forward primer. Units for thermodynamic parameters: dG = kcal/mole, dH = kcal/mole, dS = cal/mole.K, Tm = °C. The barcodes were designed with the following constraints: (1) ten nucleotides in length, (2) maximum of five flows for complete resolution, and (3) a minimum Levenshtein distance of 3 between any two barcodes. The fusion primer-barcode-template primer combinations were screened for potential for formation of homo-dimers, hetero-dimers, and hairpin structures using dinamelt as a primary screening tool followed by the Oligoanalyzer tool available through IDT-DNA (http://www.idtdna.com/analyzer/applications/oligoanalyzer/) and only primers that were free from potential secondary structure issues were retained. (XLS) [file pone.0043093.s005.xls]

## Sheet: Table heading
Table S1. Sequence information for template specific bacterial and archaeal primers, multiplexing barcodes, and thermodynamic and secondary structure parameters. (A) Sequence information for the three bacterial forward primers, Bact-338F1, Bact-338F2, and Bact-338F3, and thermodynamic parameters for the primers when used in combination with Titanium fusion primer B. (B) Sequence information for t…
Citation
1. Markham N, Zuker M (2005) DINAMelt web server for nucleic acid melting prediction. Nucl Acids Res. 33: W577-W581.

## Sheet: S1A
AdapterB	Forward fusion sequence	CTATGCGCCTTGCCAGCCCGCTCAG
plate	Primer					Oligoanalyzer-most stable hairpin				Oligoanalyzer-most stable self dimer
position	name	Total primer	Length	GC %	Mean Tm	dG	dH	dS	Tm	dG	bp	3' dist	Tm
	Bact-338F1-Adapter	CTATGCGCCTTGCCAGCCCGCTCAG-CCTACGGGRGGCAGCAG	42	69	80.9	-1.28	-34.5	-102.7	62.7	-9.89	4	4	<10
	Bact-338F2-Adapter	CTATGCGCCTTGCCAGCCCGCTCAG-ACWYCTACGGRWGGCTGC	43	65.1	79.7	-0.7	-41.1	-125	55.6	-9.89	4	4	<11
	Bact-338F3-Adapter	CTATGCGCCTTGCCAGCCCGCTCAG-CACCTACGGGTGGCAGC	42	69	81.2	-2.64	-56	-165.2	65.7	-10.12	5	2	<10
	Bact-338F1	CCTACGGGRGGCAGCAG	17	70.6	63.1	NOT RELEVANT
	Bact-338F2	ACWYCTACGGRWGGCTGC	18	61.1	63.1
	Bact-338F3	CACCTACGGGTGGCAGC	17	70.6	64

## Sheet: S1B
Bac-909R	CCGTCAATTYHTTTRAGT		F
AdapterA	Forward fusion	CGTATCGCCTCCCTCGCGCCATCAG																				Interactions with Bac-338F1					Interactions with Bac-338F2					Interactions with Bac-338F3
barcode	barcode	barcode		MFOLD analysis-most stable hairpin									Oligoanalyzer-most stable hairpin				Oligoanalyzer-most stable self dimer					Oligoanalyzer-most stable heterodimer					Oligoanalyzer-most stable heterodimer					Oligoanalyzer-most stable heterodimer
number	name	sequence	Total primer	dG	dH	dS	Tm		Length	GC %	Mean Tm		dG	dH	dS	Tm	dG	Interacting nucleotides	Closest interaction to 3' end	Tm		dG	Interacting nucleotides	Closest interaction to 3' end	Tm		dG	Interacting nucleotides	Closest interaction to 3' end	Tm		dG	Interacting nucleotides	Closest interaction to 3' end	Tm
1	Bact-909R-1	TCTATATCTG	CGTATCGCCTCCCTCGCGCCATCAG-TCTATATCTG-CCGTCAATTYHTTTRAGT	0.19	-26	-81.05	47.6		53	49.7	76.8		0.2	-26	-81.1	47.5	-10.36	4	>5	<10		-15.52	7	6	23.8		-14.96	7	3	21.9		-9.89	4	15	<10
2	Bact-909R-2	ACACATGACG	CGTATCGCCTCCCTCGCGCCATCAG-ACACATGACG-CCGTCAATTYHTTTRAGT	0.19	-26	-81.05	47.6		53	53.5	78.4		0.2	-26	-81.1	47.5	-10.36	4	>5	<10		-15.52	7	6	23.8		-14.96	7	3	21.9		-9.89	4	15	<10
3	Bact-909R-3	TATGCTATCG	CGTATCGCCTCCCTCGCGCCATCAG-TATGCTATCG-CCGTCAATTYHTTTRAGT	0.19	-26	-81.05	47.6		53	51.6	77.6		0.2	-26	-81.1	47.5	-10.36	4	>5	<10		-15.52	7	6	23.8		-14.96	7	3	21.9		-9.89	4	15	<10
4	Bact-909R-4	TCTCATAGTG	CGTATCGCCTCCCTCGCGCCATCAG-TCTCATAGTG-CCGTCAATTYHTTTRAGT	0.19	-26	-81.05	47.6		53	51.6	77.5		0.2	-26	-81.1	47.5	-10.36	4	>5	<10		-15.52	7	6	23.8		-14.96	7	3	21.9		-9.89	4	15	<10
5	Bact-909R-5	CTACACAGTG	CGTATCGCCTCCCTCGCGCCATCAG-CTACACAGTG-CCGTCAATTYHTTTRAGT	0.19	-26	-81.05	47.6		53	53.5	77.6		0.2	-26	-81.1	47.5	-10.36	4	>5	<10		-15.52	7	6	23.8		-14.96	7	3	21.9		-9.89	4	15	<10
6	Bact-909R-6	AGTCATCTAG	CGTATCGCCTCCCTCGCGCCATCAG-AGTCATCTAG-CCGTCAATTYHTTTRAGT	0.19	-26	-81.05	47.6		53	51.6	77.4		0.2	-26	-81.1	47.5	-10.36	4	>5	<10		-15.52	7	6	23.8		-14.96	7	3	21.9		-9.89	4	15	<10
7	Bact-909R-7	ATAGATATAG	CGTATCGCCTCCCTCGCGCCATCAG-ATAGATATAG-CCGTCAATTYHTTTRAGT	0.19	-26	-81.05	47.6		53	47.8	76.1		0.2	-26	-81.1	47.5	-10.36	4	>5	<10		-15.52	7	6	23.8		-14.96	7	3	21.9		-9.89	4	15	<10
8	Bact-909R-8	TGCTGTAGTG	CGTATCGCCTCCCTCGCGCCATCAG-TGCTGTAGTG-CCGTCAATTYHTTTRAGT	0.19	-26	-81.05	47.6		53	53.5	78.4		0.2	-26	-81.1	47.5	-10.36	4	>5	<10		-15.52	7	6	23.8		-14.96	7	3	21.9		-9.89	4	15	<10
9	Bact-909R-9	TGATAGATAG	CGTATCGCCTCCCTCGCGCCATCAG-TGATAGATAG-CCGTCAATTYHTTTRAGT	0.19	-26	-81.05	47.6		53	49.7	76.8		0.2	-26	-81.1	47.5	-10.36	4	>5	<10		-15.52	7	6	23.8		-14.96	7	3	21.9		-9.89	4	15	<10
10	Bact-909R-10	CTGTACTGTG	CGTATCGCCTCCCTCGCGCCATCAG-CTGTACTGTG-CCGTCAATTYHTTTRAGT	0.19	-26	-81.05	47.6		53	53.5	78.4		0.2	-26	-81.1	47.5	-10.36	4	>5	<10		-15.52	7	6	23.8		-14.96	7	3	21.9		-9.89	4	15	<10
11	Bact-909R-11	ATGCTACTAG	CGTATCGCCTCCCTCGCGCCATCAG-ATGCTACTAG-CCGTCAATTYHTTTRAGT	0.19	-26	-81.05	47.6		53	51.6	77.5		0.2	-26	-81.1	47.5	-10.36	4	>5	<10		-15.52	7	6	23.8		-14.96	7	3	21.9		-9.89	4	15	<10
12	Bact-909R-12	TAGCACACAG	CGTATCGCCTCCCTCGCGCCATCAG-TAGCACACAG-CCGTCAATTYHTTTRAGT	0.19	-26	-81.05	47.6		53	53.5	78.4		0.2	-26	-81.1	47.5	-10.36	4	>5	<10		-15.52	7	6	23.8		-14.96	7	3	21.9		-9.89	4	15	<10
13	Bact-909R-13	AGTACTCACT	CGTATCGCCTCCCTCGCGCCATCAG-AGTACTCACT-CCGTCAATTYHTTTRAGT	0.19	-26	-81.05	47.6		53	51.6	77.2		0.2	-26	-81.1	47.5	-10.36	4	>5	<10		-15.52	7	6	23.8		-14.96	7	3	21.9		-9.89	4	15	<10
14	Bact-909R-14	ACACTGCTCG	CGTATCGCCTCCCTCGCGCCATCAG-ACACTGCTCG-CCGTCAATTYHTTTRAGT	0.19	-26	-81.05	47.6		53	55.3	78.9		0.2	-26	-81.1	47.5	-10.36	4	>5	<10		-15.52	7	6	23.8		-14.96	7	3	21.9		-9.89	4	15	<10
15	Bact-909R-15	CTGTGTAGAG	CGTATCGCCTCCCTCGCGCCATCAG-CTGTGTAGAG-CCGTCAATTYHTTTRAGT	0.19	-26	-81.05	47.6		53	53.5	78.2		0.2	-26	-81.1	47.5	-10.36	4	>5	<10		-15.52	7	6	23.8		-14.96	7	3	21.9		-9.89	4	15	<10
16	Bact-909R-16	ATCGCTCTCG	CGTATCGCCTCCCTCGCGCCATCAG-ATCGCTCTCG-CCGTCAATTYHTTTRAGT	0.19	-26	-81.05	47.6		53	55.3	78.7		0.2	-26	-81.1	47.5	-10.36	4	>5	<10		-15.52	7	6	23.8		-14.96	7	3	21.9		-9.89	4	15	<10
17	Bact-909R-17	ACTGTCACTG	CGTATCGCCTCCCTCGCGCCATCAG-ACTGTCACTG-CCGTCAATTYHTTTRAGT	0.19	-26	-81.05	47.6		53	53.5	78.3		0.2	-26	-81.1	47.5	-10.36	4	>5	<10		-15.52	7	6	23.8		-14.96	7	3	21.9		-9.89	4	15	<10
18	Bact-909R-18	TGTCGCTCTG	CGTATCGCCTCCCTCGCGCCATCAG-TGTCGCTCTG-CCGTCAATTYHTTTRAGT	0.19	-26	-81.05	47.6		53	55.3	78.9		0.2	-26	-81.1	47.5	-10.36	4	>5	<10		-15.52	7	6	23.8		-14.96	7	3	21.9		-9.89	4	15	<10
19	Bact-909R-19	TGTATCAGAG	CGTATCGCCTCCCTCGCGCCATCAG-TGTATCAGAG-CCGTCAATTYHTTTRAGT	0.19	-26	-81.05	47.6		53	51.6	77.5		0.2	-26	-81.1	47.5	-10.36	4	>5	<10		-15.52	7	6	23.8		-14.96	7	3	21.9		-9.89	4	15	<10
20	Bact-909R-20	TAGCATGACG	CGTATCGCCTCCCTCGCGCCATCAG-TAGCATGACG-CCGTCAATTYHTTTRAGT	0.19	-26	-81.05	47.6		53	53.5	78.3		0.2	-26	-81.1	47.5	-10.36	4	>5	<10		-15.52	7	6	23.8		-14.96	7	3	21.9		-9.89	4	15	<10
21	Bact-909R-21	TATCGATCAG	CGTATCGCCTCCCTCGCGCCATCAG-TATCGATCAG-CCGTCAATTYHTTTRAGT	0.19	-26	-81.05	47.6		53	51.6	77.5		0.2	-26	-81.1	47.5	-10.36	4	>5	<10		-15.52	7	6	23.8		-14.96	7	3	21.9		-9.89	4	15	<10
22	Bact-909R-22	TGAGTGCACG	CGTATCGCCTCCCTCGCGCCATCAG-TGAGTGCACG-CCGTCAATTYHTTTRAGT	0.19	-26	-81.05	47.6		53	55.3	79		0.2	-26	-81.1	47.5	-10.36	4	>5	<10		-15.52	7	6	23.8		-14.96	7	3	21.9		-9.89	4	15	<10
23	Bact-909R-23	ATGTGTACTG	CGTATCGCCTCCCTCGCGCCATCAG-ATGTGTACTG-CCGTCAATTYHTTTRAGT	0.19	-26	-81.05	47.6		53	51.6	77.7		0.2	-26	-81.1	47.5	-10.36	4	>5	<10		-15.52	7	6	23.8		-14.96	7	3	21.9		-9.89	4	15	<10
24	Bact-909R-24	AGAGTACTCG	CGTATCGCCTCCCTCGCGCCATCAG-AGAGTACTCG-CCGTCAATTYHTTTRAGT	0.19	-26	-81.05	47.6		53	53.5	77.8		0.2	-26	-81.1	47.5	-10.36	4	>5	<10		-15.52	7	6	23.8		-14.96	7	3	21.9		-9.89	4	15	<10
25	Bact-909R-25	TCAGTGAGTG	CGTATCGCCTCCCTCGCGCCATCAG-TCAGTGAGTG-CCGTCAATTYHTTTRAGT	0.19	-26	-81.05	47.6		53	53.5	78.3		0.2	-26	-81.1	47.5	-10.36	4	>5	<10		-15.52	7	6	23.8		-14.96	7	3	21.9		-9.89	4	15	<10
26	Bact-909R-26	TGTCTGTACG	CGTATCGCCTCCCTCGCGCCATCAG-TGTCTGTACG-CCGTCAATTYHTTTRAGT	0.19	-26	-81.05	47.6		53	53.5	78.2		0.2	-26	-81.1	47.5	-10.36	4	>5	<10		-15.52	7	6	23.8		-14.96	7	3	21.9		-9.89	4	15	<10
27	Bact-909R-27	AGACTCGATG	CGTATCGCCTCCCTCGCGCCATCAG-AGACTCGATG-CCGTCAATTYHTTTRAGT	0.19	-26	-81.05	47.6		53	53.5	78.1		0.2	-26	-81.1	47.5	-10.36	4	>5	<10		-15.52	7	6	23.8		-14.96	7	3	21.9		-9.89	4	15	<10
28	Bact-909R-28	TCATAGTCAG	CGTATCGCCTCCCTCGCGCCATCAG-TCATAGTCAG-CCGTCAATTYHTTTRAGT	0.19	-26	-81.05	47.6		53	51.6	77.7		0.2	-26	-81.1	47.5	-10.36	4	>5	<10		-15.52	7	6	23.8		-14.96	7	3	21.9		-9.89	4	15	<10
29	Bact-909R-29	TCATCACACG	CGTATCGCCTCCCTCGCGCCATCAG-TCATCACACG-CCGTCAATTYHTTTRAGT	0.19	-26	-81.05	47.6		53	53.5	78.5		0.2	-26	-81.1	47.5	-10.36	4	>5	<10		-15.52	7	6	23.8		-14.96	7	3	21.9		-9.89	4	15	<10
30	Bact-909R-30	TATATATGAG	CGTATCGCCTCCCTCGCGCCATCAG-TATATATGAG-CCGTCAATTYHTTTRAGT	0.19	-26	-81.05	47.6		53	47.8	76.4		0.2	-26	-81.1	47.5	-10.36	4	>5	<10		-15.52	7	6	23.8		-14.96	7	3	21.9		-9.89	4	15	<10
31	Bact-909R-31	AGAGAGTCAG	CGTATCGCCTCCCTCGCGCCATCAG-AGAGAGTCAG-CCGTCAATTYHTTTRAGT	0.19	-26	-81.05	47.6		53	53.5	78.1		0.2	-26	-81.1	47.5	-10.36	4	>5	<10		-15.52	7	6	23.8		-14.96	7	3	21.9		-9.89	4	15	<10
32	Bact-909R-32	ACTCTATGTG	CGTATCGCCTCCCTCGCGCCATCAG-ACTCTATGTG-CCGTCAATTYHTTTRAGT	0.19	-26	-81.05	47.6		53	51.6	77.7		0.2	-26	-81.1	47.5	-10.36	4	>5	<10		-15.52	7	6	23.8		-14.96	7	3	21.9		-9.89	4	15	<10
33	Bact-909R-33	ACACACTGTG	CGTATCGCCTCCCTCGCGCCATCAG-ACACACTGTG-CCGTCAATTYHTTTRAGT	0.19	-26	-81.05	47.6		53	53.5	78.6		0.2	-26	-81.1	47.5	-10.36	4	>5	<10		-15.52	7	6	23.8		-14.96	7	3	21.9		-9.89	4	15	<10
34	Bact-909R-34	CTAGTATGAG	CGTATCGCCTCCCTCGCGCCATCAG-CTAGTATGAG-CCGTCAATTYHTTTRAGT	0.19	-26	-81.05	47.6		53	51.6	77.6		0.2	-26	-81.1	47.5	-10.36	4	>5	<10		-15.52	7	6	23.8		-14.96	7	3	21.9		-9.89	4	15	<10
35	Bact-909R-35	TATGTGTGTG	CGTATCGCCTCCCTCGCGCCATCAG-TATGTGTGTG-CCGTCAATTYHTTTRAGT	0.19	-26	-81.05	47.6		53	51.6	78		0.2	-26	-81.1	47.5	-10.36	4	>5	<10		-15.52	7	6	23.8		-14.96	7	3	21.9		-9.89	4	15	<10
36	Bact-909R-36	AGCTAGTATG	CGTATCGCCTCCCTCGCGCCATCAG-AGCTAGTATG-CCGTCAATTYHTTTRAGT	0.19	-26	-81.05	47.6		53	51.6	77.6		0.2	-26	-81.1	47.5	-10.36	4	>5	<10		-15.52	7	6	23.8		-14.96	7	3	21.9		-9.89	4	15	<10
37	Bact-909R-37	ACAGAGCACG	CGTATCGCCTCCCTCGCGCCATCAG-ACAGAGCACG-CCGTCAATTYHTTTRAGT	0.19	-26	-81.05	47.6		53	55.3	79		0.2	-26	-81.1	47.5	-10.36	4	>5	<10		-15.52	7	6	23.8		-14.96	7	3	21.9		-9.89	4	15	<10
38	Bact-909R-38	CTGTAGACGT	CGTATCGCCTCCCTCGCGCCATCAG-CTGTAGACGT-CCGTCAATTYHTTTRAGT	0.19	-26	-81.05	47.6		53	53.5	78.1		0.2	-26	-81.1	47.5	-10.36	4	>5	<10		-15.52	7	6	23.8		-14.96	7	3	21.9		-9.89	4	15	<10
39	Bact-909R-39	TGCTACTCTG	CGTATCGCCTCCCTCGCGCCATCAG-TGCTACTCTG-CCGTCAATTYHTTTRAGT	0.19	-26	-81.05	47.6		53	53.5	78.3		0.2	-26	-81.1	47.5	-10.36	4	>5	<10		-15.52	7	6	23.8		-14.96	7	3	21.9		-9.89	4	15	<10
40	Bact-909R-40	TCTATGCACG	CGTATCGCCTCCCTCGCGCCATCAG-TCTATGCACG-CCGTCAATTYHTTTRAGT	0.19	-26	-81.05	47.6		53	53.5	77.7		0.2	-26	-81.1	47.5	-10.36	4	>5	<10		-15.52	7	6	23.8		-14.96	7	3	21.9		-9.89	4	15	<10
41	Bact-909R-41	ATCATGTACG	CGTATCGCCTCCCTCGCGCCATCAG-ATCATGTACG-CCGTCAATTYHTTTRAGT	0.19	-26	-81.05	47.6		53	51.6	77.8		0.2	-26	-81.1	47.5	-10.36	4	>5	<10		-15.52	7	6	23.8		-14.96	7	3	21.9		-9.89	4	15	<10
42	Bact-909R-42	AGCACTAGAG	CGTATCGCCTCCCTCGCGCCATCAG-AGCACTAGAG-CCGTCAATTYHTTTRAGT	0.19	-26	-81.05	47.6		53	53.5	78.2		0.2	-26	-81.1	47.5	-10.36	4	>5	<10		-15.52	7	6	23.8		-14.96	7	3	21.9		-9.89	4	15	<10
43	Bact-909R-43	TAGTCAGATG	CGTATCGCCTCCCTCGCGCCATCAG-TAGTCAGATG-CCGTCAATTYHTTTRAGT	0.19	-26	-81.05	47.6		53	51.6	77.7		0.2	-26	-81.1	47.5	-10.36	4	>5	<10		-15.52	7	6	23.8		-14.96	7	3	21.9		-9.89	4	15	<10
44	Bact-909R-44	CTAGATCTCG	CGTATCGCCTCCCTCGCGCCATCAG-CTAGATCTCG-CCGTCAATTYHTTTRAGT	0.19	-26	-81.05	47.6		53	53.5	78.1		0.2	-26	-81.1	47.5	-10.36	4	>5	<10		-15.52	7	6	23.8		-14.96	7	3	21.9		-9.89	4	15	<10
45	Bact-909R-45	ACTGAGTGAG	CGTATCGCCTCCCTCGCGCCATCAG-ACTGAGTGAG-CCGTCAATTYHTTTRAGT	0.19	-26	-81.05	47.6		53	53.5	78.2		0.2	-26	-81.1	47.5	-10.36	4	>5	<10		-15.52	7	6	23.8		-14.96	7	3	21.9		-9.89	4	15	<10
46	Bact-909R-46	AGATATGTAG	CGTATCGCCTCCCTCGCGCCATCAG-AGATATGTAG-CCGTCAATTYHTTTRAGT	0.19	-26	-81.05	47.6		53	49.7	76.9		0.2	-26	-81.1	47.5	-10.36	4	>5	<10		-15.52	7	6	23.8		-14.96	7	3	21.9		-9.89	4	15	<10
47	Bact-909R-47	ATATCACGTG	CGTATCGCCTCCCTCGCGCCATCAG-ATATCACGTG-CCGTCAATTYHTTTRAGT	0.19	-26	-81.05	47.6		53	51.6	77.7		0.2	-26	-81.1	47.5	-10.36	4	>5	<10		-15.52	7	6	23.8		-14.96	7	3	21.9		-9.89	4	15	<10
48	Bact-909R-48	TAGCATCGTG	CGTATCGCCTCCCTCGCGCCATCAG-TAGCATCGTG-CCGTCAATTYHTTTRAGT	0.19	-26	-81.05	47.6		53	53.5	78.3		0.2	-26	-81.1	47.5	-10.36	4	>5	<10		-15.52	7	6	23.8		-14.96	7	3	21.9		-9.89	4	15	<10
49	Bact-909R-49	AGCTACATCG	CGTATCGCCTCCCTCGCGCCATCAG-AGCTACATCG-CCGTCAATTYHTTTRAGT	0.19	-26	-81.05	47.6		53	53.5	78.2		0.2	-26	-81.1	47.5	-10.36	4	>5	<10		-15.52	7	6	23.8		-14.96	7	3	21.9		-9.89	4	15	<10
50	Bact-909R-50	TCGCTCTGTG	CGTATCGCCTCCCTCGCGCCATCAG-TCGCTCTGTG-CCGTCAATTYHTTTRAGT	0.19	-26	-81.05	47.6		53	55.3	78.9		0.2	-26	-81.1	47.5	-10.36	4	>5	<10		-15.52	7	6	23.8		-14.96	7	3	21.9		-9.89	4	15	<10
51	Bact-909R-51	TATCTAGTAT	CGTATCGCCTCCCTCGCGCCATCAG-TATCTAGTAT-CCGTCAATTYHTTTRAGT	0.19	-26	-81.05	47.6		53	47.8	75.9		0.2	-26	-81.1	47.5	-10.36	4	>5	<10		-15.52	7	6	23.8		-14.96	7	3	21.9		-9.89	4	15	<10
52	Bact-909R-52	ATATCTCTAG	CGTATCGCCTCCCTCGCGCCATCAG-ATATCTCTAG-CCGTCAATTYHTTTRAGT	0.19	-26	-81.05	47.6		53	49.7	76.6		0.2	-26	-81.1	47.5	-10.36	4	>5	<10		-15.52	7	6	23.8		-14.96	7	3	21.9		-9.89	4	15	<10
53	Bact-909R-53	TGTACACGTG	CGTATCGCCTCCCTCGCGCCATCAG-TGTACACGTG-CCGTCAATTYHTTTRAGT	0.19	-26	-81.05	47.6		53	53.5	78.3		0.2	-26	-81.1	47.5	-10.36	4	>5	<10		-15.52	7	6	23.8		-14.96	7	3	21.9		-9.89	4	15	<10
54	Bact-909R-54	TACTATACAG	CGTATCGCCTCCCTCGCGCCATCAG-TACTATACAG-CCGTCAATTYHTTTRAGT	0.19	-26	-81.05	47.6		53	49.7	76.8		0.2	-26	-81.1	47.5	-10.36	4	>5	<10		-15.52	7	6	23.8		-14.96	7	3	21.9		-9.89	4	15	<10
55	Bact-909R-55	TACATCTATG	CGTATCGCCTCCCTCGCGCCATCAG-TACATCTATG-CCGTCAATTYHTTTRAGT	0.19	-26	-81.05	47.6		53	49.7	77		0.2	-26	-81.1	47.5	-10.36	4	>5	<10		-15.52	7	6	23.8		-14.96	7	3	21.9		-9.89	4	15	<10
56	Bact-909R-56	TGTGATATAG	CGTATCGCCTCCCTCGCGCCATCAG-TGTGATATAG-CCGTCAATTYHTTTRAGT	0.19	-26	-81.05	47.6		53	49.7	77		0.2	-26	-81.1	47.5	-10.36	4	>5	<10		-15.52	7	6	23.8		-14.96	7	3	21.9		-9.89	4	15	<10
57	Bact-909R-57	TCATGTGTCG	CGTATCGCCTCCCTCGCGCCATCAG-TCATGTGTCG-CCGTCAATTYHTTTRAGT	0.19	-26	-81.05	47.6		53	53.5	78.4		0.2	-26	-81.1	47.5	-10.36	4	>5	<10		-15.52	7	6	23.8		-14.96	7	3	21.9		-9.89	4	15	<10
58	Bact-909R-58	TACTAGTGTG	CGTATCGCCTCCCTCGCGCCATCAG-TACTAGTGTG-CCGTCAATTYHTTTRAGT	0.19	-26	-81.05	47.6		53	51.6	77.5		0.2	-26	-81.1	47.5	-10.36	4	>5	<10		-15.52	7	6	23.8		-14.96	7	3	21.9		-9.89	4	15	<10
59	Bact-909R-59	AGCTGTGACG	CGTATCGCCTCCCTCGCGCCATCAG-AGCTGTGACG-CCGTCAATTYHTTTRAGT	0.19	-26	-81.05	47.6		53	55.3	78.9		0.2	-26	-81.1	47.5	-10.36	4	>5	<10		-15.52	7	6	23.8		-14.96	7	3	21.9		-9.89	4	15	<10
60	Bact-909R-60	CATCTACGTG	CGTATCGCCTCCCTCGCGCCATCAG-CATCTACGTG-CCGTCAATTYHTTTRAGT	0.19	-26	-81.05	47.6		53	53.5	78.3		0.2	-26	-81.1	47.5	-10.36	4	>5	<10		-15.52	7	6	23.8		-14.96	7	3	21.9		-9.89	4	15	<10
61	Bact-909R-61	TACATGAGAG	CGTATCGCCTCCCTCGCGCCATCAG-TACATGAGAG-CCGTCAATTYHTTTRAGT	0.19	-26	-81.05	47.6		53	51.6	77.5		0.2	-26	-81.1	47.5	-10.36	4	>5	<10		-15.52	7	6	23.8		-14.96	7	3	21.9		-9.89	4	15	<10
62	Bact-909R-62	ATGTCATACG	CGTATCGCCTCCCTCGCGCCATCAG-ATGTCATACG-CCGTCAATTYHTTTRAGT	0.19	-26	-81.05	47.6		53	51.6	77.7		0.2	-26	-81.1	47.5	-10.36	4	>5	<10		-15.52	7	6	23.8		-14.96	7	3	21.9		-9.89	4	15	<10
63	Bact-909R-63	CTAGCTGTAG	CGTATCGCCTCCCTCGCGCCATCAG-CTAGCTGTAG-CCGTCAATTYHTTTRAGT	0.16	-32.4	-100.76	48.4		53	53.5	78.1		0.17	-32.4	-100.9	48	-17.54	10	>5	41.4		-15.52	7	6	23.8		-14.96	7	3	21.9		-9.89	4	15	<10
64	Bact-909R-64	ACTATCGCAG	CGTATCGCCTCCCTCGCGCCATCAG-ACTATCGCAG-CCGTCAATTYHTTTRAGT	0.14	-33.6	-104.41	48.7		53	53.5	78.2		0.15	-33.6	-104.6	48.1	-10.36	4	>5	<10		-15.52	7	6	23.8		-14.96	7	3	21.9		-9.89	4	15	<10
65	Bact-909R-65	AGTGTGATAG	CGTATCGCCTCCCTCGCGCCATCAG-AGTGTGATAG-CCGTCAATTYHTTTRAGT	0.09	-23.1	-71.76	48.8		53	51.6	77.5		0.1	-23.7	-73.7	48.6	-10.36	4	>5	<10		-15.52	7	6	23.8		-14.96	7	3	21.9		-9.89	4	15	<10
66	Bact-909R-66	ACTGCTCGTG	CGTATCGCCTCCCTCGCGCCATCAG-ACTGCTCGTG-CCGTCAATTYHTTTRAGT	0.11	-43.6	-135.26	49.2		53	55.3	78.9		0.1	-43.6	-135.2	49.3	-10.36	4	>5	<10		-15.52	7	6	23.8		-14.96	7	3	21.9		-9.89	4	15	<10
67	Bact-909R-67	AGTATAGCGT	CGTATCGCCTCCCTCGCGCCATCAG-AGTATAGCGT-CCGTCAATTYHTTTRAGT	0.08	-32.3	-100.2	49.2		53	51.6	77.3		0.09	-32.3	-100.3	49	-10.36	4	>5	<10		-15.52	7	6	23.8		-14.96	7	3	21.9		-9.89	4	15	<10
68	Bact-909R-68	ACTAGACATG	CGTATCGCCTCCCTCGCGCCATCAG-ACTAGACATG-CCGTCAATTYHTTTRAGT	0.05	-28.2	-87.42	49.4		53	51.6	77.5		0.05	-28.2	-87.6	48.9	-10.36	4	>5	<10		-15.52	7	6	23.8		-14.96	7	3	21.9		-9.89	4	15	<10
69	Bact-909R-69	TGCTCGCACG	CGTATCGCCTCCCTCGCGCCATCAG-TGCTCGCACG-CCGTCAATTYHTTTRAGT	0.04	-33.6	-104.1	49.6		53	57.2	79.7		0.04	-33.6	-104	50	-10.36	4	>5	<10		-15.52	7	6	23.8		-14.96	7	3	21.9		-9.89	4	15	<10
70	Bact-909R-70	TGTGAGTCGT	CGTATCGCCTCCCTCGCGCCATCAG-TGTGAGTCGT-CCGTCAATTYHTTTRAGT	0	-44.2	-136.78	50		53	53.5	78.1		0	-44.2	-136.8	50	-10.36	4	>5	<10		-15.52	7	6	23.8		-14.96	7	3	21.9		-9.89	4	15	<10

## Sheet: S1C
AdapterB	Forward fusion	CTATGCGCCTTGCCAGCCCGCTCAG
plate	Primer					Oligoanalyzer-most stable hairpin				Oligoanalyzer-most stable self dimer
position	name	Total primer	Length	GC %	Mean Tm	dG	dH	dS	Tm	dG	bp	3' dist	Tm
	Arch-340F-adapter	CTATGCGCCTTGCCAGCCCGCTCAG-CCCTAHGGGGYGCASCA	42	68.7	82	-0.96	-51.2	-155.3	56.4	-17.17	8	1	35.7
	Arch-340F	CCCTAHGGGGYGCASCA	18	66.7	64.5	NOT RELEVANT

## Sheet: S1D
Arch-915R	GWGCYCCCCCGYCAATTC		F
AdapterA	Forward fusion	CGTATCGCCTCCCTCGCGCCATCAG																				Interactions with Arch-340F
barcode	barcode	barcode		MFOLD analysis-most stable hairpin									Oligoanalyzer-most stable hairpin				Oligoanalyzer-most stable self dimer					Oligoanalyzer-most stable heterodimer
number	name	sequence	Total primer	dG	dH	dS	Tm		Length	GC %	Mean Tm		dG	dH	dS	Tm	dG	Interacting nucleotides	Closest interaction to 3' end	Tm		dG	Interacting nucleotides	Closest interaction to 3' end	Tm
1	Arch-915R-1	AGTGACTAGA	CGTATCGCCTCCCTCGCGCCATCAG-AGTGACTAGA-GWGCYCCCCCGYCAATTC	0.19	-26	-81.05	47.6		53	62.3	79.6		0.2	-26	-81.1	47.5	-11.03	6	>5	13.6		-14.1	7	>5	26.1
2	Arch-915R-2	TCGTCTCAGT	CGTATCGCCTCCCTCGCGCCATCAG-TCGTCTCAGT-GWGCYCCCCCGYCAATTC	0.19	-26	-81.05	47.6		53	64.2	80.5		0.2	-26	-81.1	47.5	-11.03	6	>5	13.6		-14.1	7	>5	26.1
3	Arch-915R-3	TGACACGACA	CGTATCGCCTCCCTCGCGCCATCAG-TGACACGACA-GWGCYCCCCCGYCAATTC	0.19	-26	-81.05	47.6		53	64.2	80.6		0.2	-26	-81.1	47.5	-11.03	6	>5	13.6		-14.1	7	>5	26.1
4	Arch-915R-4	TCGTACATCA	CGTATCGCCTCCCTCGCGCCATCAG-TCGTACATCA-GWGCYCCCCCGYCAATTC	0.19	-26	-81.05	47.6		53	62.3	79.9		0.2	-26	-81.1	47.5	-11.03	6	>5	13.6		-14.1	7	>5	26.1
5	Arch-915R-5	TCACGACATA	CGTATCGCCTCCCTCGCGCCATCAG-TCACGACATA-GWGCYCCCCCGYCAATTC	0.19	-26	-81.05	47.6		53	62.3	79.9		0.2	-26	-81.1	47.5	-11.03	6	>5	13.6		-14.1	7	>5	26.1
6	Arch-915R-6	TAGCTCGATA	CGTATCGCCTCCCTCGCGCCATCAG-TAGCTCGATA-GWGCYCCCCCGYCAATTC	0.19	-26	-81.05	47.6		53	62.3	79.7		0.2	-26	-81.1	47.5	-11.03	6	>5	13.6		-14.1	7	>5	26.1
7	Arch-915R-7	TACATGTCTA	CGTATCGCCTCCCTCGCGCCATCAG-TACATGTCTA-GWGCYCCCCCGYCAATTC	0.19	-26	-81.05	47.6		53	60.4	79.2		0.2	-26	-81.1	47.5	-11.03	6	>5	13.6		-14.1	7	>5	26.1
8	Arch-915R-8	TACATGTAGT	CGTATCGCCTCCCTCGCGCCATCAG-TACATGTAGT-GWGCYCCCCCGYCAATTC	0.19	-26	-81.05	47.6		53	60.4	78.6		0.2	-26	-81.1	47.5	-11.03	6	>5	13.6		-14.1	7	>5	26.1
9	Arch-915R-9	ACGTCAGACT	CGTATCGCCTCCCTCGCGCCATCAG-ACGTCAGACT-GWGCYCCCCCGYCAATTC	0.19	-26	-81.05	47.6		53	64.2	80.5		0.2	-26	-81.1	47.5	-11.03	6	>5	13.6		-14.1	7	>5	26.1
10	Arch-915R-10	TCGACAGTGA	CGTATCGCCTCCCTCGCGCCATCAG-TCGACAGTGA-GWGCYCCCCCGYCAATTC	0.19	-26	-81.05	47.6		53	64.2	80.5		0.2	-26	-81.1	47.5	-11.03	6	>5	13.6		-14.1	7	>5	26.1
11	Arch-915R-11	TACGTACAGA	CGTATCGCCTCCCTCGCGCCATCAG-TACGTACAGA-GWGCYCCCCCGYCAATTC	0.19	-26	-81.05	47.6		53	62.3	79.7		0.2	-26	-81.1	47.5	-11.03	6	>5	13.6		-14.1	7	>5	26.1
12	Arch-915R-12	TCAGTAGCTA	CGTATCGCCTCCCTCGCGCCATCAG-TCAGTAGCTA-GWGCYCCCCCGYCAATTC	0.19	-26	-81.05	47.6		53	62.3	79.7		0.2	-26	-81.1	47.5	-11.03	6	>5	13.6		-14.1	7	>5	26.1
13	Arch-915R-13	TCGTCGAGTA	CGTATCGCCTCCCTCGCGCCATCAG-TCGTCGAGTA-GWGCYCCCCCGYCAATTC	0.19	-26	-81.05	47.6		53	64.2	80.2		0.2	-26	-81.1	47.5	-11.03	6	>5	13.6		-14.1	7	>5	26.1
14	Arch-915R-14	ACTCGTATCT	CGTATCGCCTCCCTCGCGCCATCAG-ACTCGTATCT-GWGCYCCCCCGYCAATTC	0.19	-26	-81.05	47.6		53	62.3	79.7		0.2	-26	-81.1	47.5	-11.03	6	>5	13.6		-14.1	7	>5	26.1
15	Arch-915R-15	ACGACTAGCT	CGTATCGCCTCCCTCGCGCCATCAG-ACGACTAGCT-GWGCYCCCCCGYCAATTC	0.19	-26	-81.05	47.6		53	64.2	80.4		0.2	-26	-81.1	47.5	-11.03	6	>5	13.6		-14.1	7	>5	26.1
16	Arch-915R-16	TGTACTGCTA	CGTATCGCCTCCCTCGCGCCATCAG-TGTACTGCTA-GWGCYCCCCCGYCAATTC	0.19	-26	-81.05	47.6		53	62.3	79.9		0.2	-26	-81.1	47.5	-11.03	6	>5	13.6		-14.1	7	>5	26.1
17	Arch-915R-17	CACGTCTCTA	CGTATCGCCTCCCTCGCGCCATCAG-CACGTCTCTA-GWGCYCCCCCGYCAATTC	0.19	-26	-81.05	47.6		53	64.2	80.4		0.2	-26	-81.1	47.5	-11.03	6	>5	13.6		-14.1	7	>5	26.1
18	Arch-915R-18	TACGTATGCA	CGTATCGCCTCCCTCGCGCCATCAG-TACGTATGCA-GWGCYCCCCCGYCAATTC	0.19	-26	-81.05	47.6		53	62.3	80		0.2	-26	-81.1	47.5	-11.03	6	>5	13.6		-14.1	7	>5	26.1
19	Arch-915R-19	TACTCTCATA	CGTATCGCCTCCCTCGCGCCATCAG-TACTCTCATA-GWGCYCCCCCGYCAATTC	0.19	-26	-81.05	47.6		53	60.4	79.1		0.2	-26	-81.1	47.5	-11.03	6	>5	13.6		-14.1	7	>5	26.1
20	Arch-915R-20	CTACAGTATA	CGTATCGCCTCCCTCGCGCCATCAG-CTACAGTATA-GWGCYCCCCCGYCAATTC	0.19	-26	-81.05	47.6		53	60.4	79.2		0.2	-26	-81.1	47.5	-11.03	6	>5	13.6		-14.1	7	>5	26.1
21	Arch-915R-21	ACTGTGAGTA	CGTATCGCCTCCCTCGCGCCATCAG-ACTGTGAGTA-GWGCYCCCCCGYCAATTC	0.19	-26	-81.05	47.6		53	62.3	79.8		0.2	-26	-81.1	47.5	-11.03	6	>5	13.6		-14.1	7	>5	26.1
22	Arch-915R-22	TACGTATCGT	CGTATCGCCTCCCTCGCGCCATCAG-TACGTATCGT-GWGCYCCCCCGYCAATTC	0.19	-26	-81.05	47.6		53	62.3	79.8		0.2	-26	-81.1	47.5	-11.03	6	>5	13.6		-14.1	7	>5	26.1
23	Arch-915R-23	ATGTACACTA	CGTATCGCCTCCCTCGCGCCATCAG-ATGTACACTA-GWGCYCCCCCGYCAATTC	0.19	-26	-81.05	47.6		53	60.4	79.2		0.2	-26	-81.1	47.5	-11.03	6	>5	13.6		-14.1	7	>5	26.1
24	Arch-915R-24	AGTCTATAGT	CGTATCGCCTCCCTCGCGCCATCAG-AGTCTATAGT-GWGCYCCCCCGYCAATTC	0.19	-26	-81.05	47.6		53	60.4	79.1		0.2	-26	-81.1	47.5	-11.03	6	>5	13.6		-14.1	7	>5	26.1
25	Arch-915R-25	CTGTACTACT	CGTATCGCCTCCCTCGCGCCATCAG-CTGTACTACT-GWGCYCCCCCGYCAATTC	0.19	-26	-81.05	47.6		53	62.3	79.9		0.2	-26	-81.1	47.5	-11.03	6	>5	13.6		-14.1	7	>5	26.1
26	Arch-915R-26	ATCGACGACT	CGTATCGCCTCCCTCGCGCCATCAG-ATCGACGACT-GWGCYCCCCCGYCAATTC	0.19	-26	-81.05	47.6		53	64.2	80.4		0.2	-26	-81.1	47.5	-11.03	6	>5	13.6		-14.1	7	>5	26.1
27	Arch-915R-27	AGTAGTGTCT	CGTATCGCCTCCCTCGCGCCATCAG-AGTAGTGTCT-GWGCYCCCCCGYCAATTC	0.19	-26	-81.05	47.6		53	62.3	79.8		0.2	-26	-81.1	47.5	-11.03	6	>5	13.6		-14.1	7	>5	26.1
28	Arch-915R-28	ATCGTGTGTA	CGTATCGCCTCCCTCGCGCCATCAG-ATCGTGTGTA-GWGCYCCCCCGYCAATTC	0.19	-26	-81.05	47.6		53	62.3	79.9		0.2	-26	-81.1	47.5	-11.03	6	>5	13.6		-14.1	7	>5	26.1
29	Arch-915R-29	CTAGTGTCGT	CGTATCGCCTCCCTCGCGCCATCAG-CTAGTGTCGT-GWGCYCCCCCGYCAATTC	0.19	-26	-81.05	47.6		53	64.2	80.6		0.2	-26	-81.1	47.5	-11.03	6	>5	13.6		-14.1	7	>5	26.1
30	Arch-915R-30	ATCTCTAGTA	CGTATCGCCTCCCTCGCGCCATCAG-ATCTCTAGTA-GWGCYCCCCCGYCAATTC	0.19	-26	-81.05	47.6		53	60.4	78.9		0.2	-26	-81.1	47.5	-11.03	6	>5	13.6		-14.1	7	>5	26.1
31	Arch-915R-31	TATGTAGACT	CGTATCGCCTCCCTCGCGCCATCAG-TATGTAGACT-GWGCYCCCCCGYCAATTC	0.19	-26	-81.05	47.6		53	60.4	79.2		0.2	-26	-81.1	47.5	-11.03	6	>5	13.6		-14.1	7	>5	26.1
32	Arch-915R-32	ATACGTGACT	CGTATCGCCTCCCTCGCGCCATCAG-ATACGTGACT-GWGCYCCCCCGYCAATTC	0.19	-26	-81.05	47.6		53	62.3	79.9		0.2	-26	-81.1	47.5	-11.03	6	>5	13.6		-14.1	7	>5	26.1
33	Arch-915R-33	TACACAGTCA	CGTATCGCCTCCCTCGCGCCATCAG-TACACAGTCA-GWGCYCCCCCGYCAATTC	0.19	-26	-81.05	47.6		53	62.3	80		0.2	-26	-81.1	47.5	-11.03	6	>5	13.6		-14.1	7	>5	26.1
34	Arch-915R-34	CACTATACGT	CGTATCGCCTCCCTCGCGCCATCAG-CACTATACGT-GWGCYCCCCCGYCAATTC	0.19	-26	-81.05	47.6		53	62.3	80		0.2	-26	-81.1	47.5	-11.03	6	>5	13.6		-14.1	7	>5	26.1
35	Arch-915R-35	CTGTCGTACA	CGTATCGCCTCCCTCGCGCCATCAG-CTGTCGTACA-GWGCYCCCCCGYCAATTC	0.19	-26	-81.05	47.6		53	64.2	80.6		0.2	-26	-81.1	47.5	-11.03	6	>5	13.6		-14.1	7	>5	26.1
36	Arch-915R-36	TCGATCTACA	CGTATCGCCTCCCTCGCGCCATCAG-TCGATCTACA-GWGCYCCCCCGYCAATTC	0.19	-26	-81.05	47.6		53	62.3	79.7		0.2	-26	-81.1	47.5	-11.03	6	>5	13.6		-14.1	7	>5	26.1
37	Arch-915R-37	AGATGTCGTA	CGTATCGCCTCCCTCGCGCCATCAG-AGATGTCGTA-GWGCYCCCCCGYCAATTC	0.19	-26	-81.05	47.6		53	62.3	79.7		0.2	-26	-81.1	47.5	-11.03	6	>5	13.6		-14.1	7	>5	26.1
38	Arch-915R-38	ACGACGATCA	CGTATCGCCTCCCTCGCGCCATCAG-ACGACGATCA-GWGCYCCCCCGYCAATTC	0.19	-26	-81.05	47.6		53	64.2	80.4		0.2	-26	-81.1	47.5	-11.03	6	>5	13.6		-14.1	7	>5	26.1
39	Arch-915R-39	TCTGTGTATA	CGTATCGCCTCCCTCGCGCCATCAG-TCTGTGTATA-GWGCYCCCCCGYCAATTC	0.19	-26	-81.05	47.6		53	60.4	79.2		0.2	-26	-81.1	47.5	-11.03	6	>5	13.6		-14.1	7	>5	26.1
40	Arch-915R-40	TGTCAGTATA	CGTATCGCCTCCCTCGCGCCATCAG-TGTCAGTATA-GWGCYCCCCCGYCAATTC	0.19	-26	-81.05	47.6		53	60.4	79.2		0.2	-26	-81.1	47.5	-11.03	6	>5	13.6		-14.1	7	>5	26.1
41	Arch-915R-41	TCTATATAGT	CGTATCGCCTCCCTCGCGCCATCAG-TCTATATAGT-GWGCYCCCCCGYCAATTC	0.19	-26	-81.05	47.6		53	58.5	78.5		0.2	-26	-81.1	47.5	-11.03	6	>5	13.6		-14.1	7	>5	26.1
42	Arch-915R-42	TAGCTCTAGT	CGTATCGCCTCCCTCGCGCCATCAG-TAGCTCTAGT-GWGCYCCCCCGYCAATTC	0.19	-26	-81.05	47.6		53	62.3	79.7		0.2	-26	-81.1	47.5	-11.03	6	>5	13.6		-14.1	7	>5	26.1
43	Arch-915R-43	ACGTGTCATA	CGTATCGCCTCCCTCGCGCCATCAG-ACGTGTCATA-GWGCYCCCCCGYCAATTC	0.19	-26	-81.05	47.6		53	62.3	79.9		0.2	-26	-81.1	47.5	-11.03	6	>5	13.6		-14.1	7	>5	26.1
44	Arch-915R-44	CTACTGTACT	CGTATCGCCTCCCTCGCGCCATCAG-CTACTGTACT-GWGCYCCCCCGYCAATTC	0.19	-26	-81.05	47.6		53	62.3	79.9		0.2	-26	-81.1	47.5	-11.03	6	>5	13.6		-14.1	7	>5	26.1
45	Arch-915R-45	TCGTGTGTGT	CGTATCGCCTCCCTCGCGCCATCAG-TCGTGTGTGT-GWGCYCCCCCGYCAATTC	0.19	-26	-81.05	47.6		53	64.2	80.8		0.2	-26	-81.1	47.5	-11.03	6	>5	13.6		-14.1	7	>5	26.1
46	Arch-915R-46	ACACGACTAT	CGTATCGCCTCCCTCGCGCCATCAG-ACACGACTAT-GWGCYCCCCCGYCAATTC	0.19	-26	-81.05	47.6		53	62.3	79.9		0.2	-26	-81.1	47.5	-11.03	6	>5	13.6		-14.1	7	>5	26.1
47	Arch-915R-47	CATCGTCGTA	CGTATCGCCTCCCTCGCGCCATCAG-CATCGTCGTA-GWGCYCCCCCGYCAATTC	0.19	-26	-81.05	47.6		53	64.2	80.5		0.2	-26	-81.1	47.5	-11.03	6	>5	13.6		-14.1	7	>5	26.1
48	Arch-915R-48	AGACTATACA	CGTATCGCCTCCCTCGCGCCATCAG-AGACTATACA-GWGCYCCCCCGYCAATTC	0.19	-26	-81.05	47.6		53	60.4	79.1		0.2	-26	-81.1	47.5	-11.03	6	>5	13.6		-14.1	7	>5	26.1
49	Arch-915R-49	TATAGACTCT	CGTATCGCCTCCCTCGCGCCATCAG-TATAGACTCT-GWGCYCCCCCGYCAATTC	0.19	-26	-81.05	47.6		53	60.4	79.1		0.2	-26	-81.1	47.5	-11.03	6	>5	13.6		-14.1	7	>5	26.1
50	Arch-915R-50	CTCGTAGTGA	CGTATCGCCTCCCTCGCGCCATCAG-CTCGTAGTGA-GWGCYCCCCCGYCAATTC	0.19	-26	-81.05	47.6		53	64.2	80.4		0.2	-26	-81.1	47.5	-11.03	6	>5	13.6		-14.1	7	>5	26.1
51	Arch-915R-51	TACTATCTCT	CGTATCGCCTCCCTCGCGCCATCAG-TACTATCTCT-GWGCYCCCCCGYCAATTC	0.19	-26	-81.05	47.6		53	60.4	79.1		0.2	-26	-81.1	47.5	-11.03	6	>5	13.6		-14.1	7	>5	26.1
52	Arch-915R-52	CTATACGTGT	CGTATCGCCTCCCTCGCGCCATCAG-CTATACGTGT-GWGCYCCCCCGYCAATTC	0.19	-26	-81.05	47.6		53	62.3	80		0.2	-26	-81.1	47.5	-11.03	6	>5	13.6		-14.1	7	>5	26.1
53	Arch-915R-53	ATAGTCACGA	CGTATCGCCTCCCTCGCGCCATCAG-ATAGTCACGA-GWGCYCCCCCGYCAATTC	0.19	-26	-81.05	47.6		53	62.3	79.7		0.2	-26	-81.1	47.5	-11.03	6	>5	13.6		-14.1	7	>5	26.1
54	Arch-915R-54	TCATCGTATA	CGTATCGCCTCCCTCGCGCCATCAG-TCATCGTATA-GWGCYCCCCCGYCAATTC	0.19	-26	-81.05	47.6		53	60.4	79.2		0.2	-26	-81.1	47.5	-11.03	6	>5	13.6		-14.1	7	>5	26.1
55	Arch-915R-55	AGACGTATGA	CGTATCGCCTCCCTCGCGCCATCAG-AGACGTATGA-GWGCYCCCCCGYCAATTC	0.19	-26	-81.05	47.6		53	62.3	79.7		0.2	-26	-81.1	47.5	-11.03	6	>5	13.6		-14.1	7	>5	26.1
56	Arch-915R-56	ACATACTATA	CGTATCGCCTCCCTCGCGCCATCAG-ACATACTATA-GWGCYCCCCCGYCAATTC	0.19	-26	-81.05	47.6		53	58.5	78.5		0.2	-26	-81.1	47.5	-11.03	6	>5	13.6		-14.1	7	>5	26.1
57	Arch-915R-57	TAGTGTGAGA	CGTATCGCCTCCCTCGCGCCATCAG-TAGTGTGAGA-GWGCYCCCCCGYCAATTC	0.19	-26	-81.05	47.6		53	62.3	79.8		0.2	-26	-81.1	47.5	-11.03	6	>5	13.6		-14.1	7	>5	26.1
58	Arch-915R-58	CAGACGTACT	CGTATCGCCTCCCTCGCGCCATCAG-CAGACGTACT-GWGCYCCCCCGYCAATTC	0.19	-26	-81.05	47.6		53	64.2	80.6		0.2	-26	-81.1	47.5	-11.03	6	>5	13.6		-14.1	7	>5	26.1
59	Arch-915R-59	TCTCGTCTAT	CGTATCGCCTCCCTCGCGCCATCAG-TCTCGTCTAT-GWGCYCCCCCGYCAATTC	0.19	-26	-81.05	47.6		53	62.3	79.7		0.2	-26	-81.1	47.5	-11.03	6	>5	13.6		-14.1	7	>5	26.1
60	Arch-915R-60	TGTATCTATA	CGTATCGCCTCCCTCGCGCCATCAG-TGTATCTATA-GWGCYCCCCCGYCAATTC	0.19	-26	-81.05	47.6		53	58.5	78.5		0.2	-26	-81.1	47.5	-11.03	6	>5	13.6		-14.1	7	>5	26.1
61	Arch-915R-61	CATACTACGA	CGTATCGCCTCCCTCGCGCCATCAG-CATACTACGA-GWGCYCCCCCGYCAATTC	0.19	-26	-81.05	47.6		53	62.3	79.8		0.2	-26	-81.1	47.5	-11.03	6	>5	13.6		-14.1	7	>5	26.1
62	Arch-915R-62	ATCTACGTCA	CGTATCGCCTCCCTCGCGCCATCAG-ATCTACGTCA-GWGCYCCCCCGYCAATTC	0.19	-26	-81.05	47.6		53	62.3	79.7		0.2	-26	-81.1	47.5	-11.03	6	>5	13.6		-14.1	7	>5	26.1
63	Arch-915R-63	TGTCTAGAGA	CGTATCGCCTCCCTCGCGCCATCAG-TGTCTAGAGA-GWGCYCCCCCGYCAATTC	0.19	-26	-81.05	47.6		53	62.3	79.6		0.2	-26	-81.1	47.5	-11.03	6	>5	13.6		-14.1	7	>5	26.1
64	Arch-915R-64	TACATCGACT	CGTATCGCCTCCCTCGCGCCATCAG-TACATCGACT-GWGCYCCCCCGYCAATTC	0.19	-26	-81.05	47.6		53	62.3	79.9		0.2	-26	-81.1	47.5	-11.03	6	>5	13.6		-14.1	7	>5	26.1
65	Arch-915R-65	CAGACGTCGA	CGTATCGCCTCCCTCGCGCCATCAG-CAGACGTCGA-GWGCYCCCCCGYCAATTC	0.19	-26	-81.05	47.6		53	66	81.1		0.2	-26	-81.1	47.5	-11.03	6	>5	13.6		-14.1	7	>5	26.1
66	Arch-915R-66	TCTACTACGT	CGTATCGCCTCCCTCGCGCCATCAG-TCTACTACGT-GWGCYCCCCCGYCAATTC	0.19	-26	-81.05	47.6		53	62.3	79.7		0.2	-26	-81.1	47.5	-11.03	6	>5	13.6		-14.1	7	>5	26.1
67	Arch-915R-67	CACTACGACT	CGTATCGCCTCCCTCGCGCCATCAG-CACTACGACT-GWGCYCCCCCGYCAATTC	0.19	-26	-81.05	47.6		53	64.2	80.6		0.2	-26	-81.1	47.5	-11.03	6	>5	13.6		-14.1	7	>5	26.1
68	Arch-915R-68	ACGTATCTAT	CGTATCGCCTCCCTCGCGCCATCAG-ACGTATCTAT-GWGCYCCCCCGYCAATTC	0.19	-26	-81.05	47.6		53	60.4	79.2		0.2	-26	-81.1	47.5	-11.03	6	>5	13.6		-14.1	7	>5	26.1
69	Arch-915R-69	CTACGATCGA	CGTATCGCCTCCCTCGCGCCATCAG-CTACGATCGA-GWGCYCCCCCGYCAATTC	0.19	-26	-81.05	47.6		53	64.2	80.4		0.2	-26	-81.1	47.5	-11.85	6	>5	<10		-14.1	7	>5	26.1
70	Arch-915R-70	AGATAGACGA	CGTATCGCCTCCCTCGCGCCATCAG-AGATAGACGA-GWGCYCCCCCGYCAATTC	0.19	-26	-81.05	47.6		53	62.3	79.6		0.2	-26	-81.1	47.5	-11.03	6	>5	13.6		-14.1	7	>5	26.1
71	Arch-915R-71	TCACACTCGT	CGTATCGCCTCCCTCGCGCCATCAG-TCACACTCGT-GWGCYCCCCCGYCAATTC	0.19	-26	-81.05	47.6		53	64.2	80.6		0.17	-22.3	-69.6	47.1	-11.03	6	>5	13.6		-14.1	7	>5	26.1
72	Arch-915R-72	TGTCGACTGT	CGTATCGCCTCCCTCGCGCCATCAG-TGTCGACTGT-GWGCYCCCCCGYCAATTC	0.14	-34.6	-107.5	48.7		53	64.2	80.6		0.15	-34.6	-107.7	48.1	-11.03	6	>5	13.6		-14.1	7	>5	26.1
73	Arch-915R-73	TGAGAGACTA	CGTATCGCCTCCCTCGCGCCATCAG-TGAGAGACTA-GWGCYCCCCCGYCAATTC	0.11	-38	-117.93	49.1		53	62.3	79.6		0.11	-38	-117.9	49.2	-11.03	6	>5	13.6		-14.1	7	>5	26.1
74	Arch-915R-74	TAGATACATA	CGTATCGCCTCCCTCGCGCCATCAG-TAGATACATA-GWGCYCCCCCGYCAATTC	0.1	-16.7	-51.99	48.1		53	58.5	78.5		0.11	-17.3	-53.8	48.1	-11.03	6	>5	13.6		-14.1	7	>5	26.1
75	Arch-915R-75	TGTGTCACTA	CGTATCGCCTCCCTCGCGCCATCAG-TGTGTCACTA-GWGCYCCCCCGYCAATTC	0.1	-20.1	-62.51	48.4		53	62.3	80		0.1	-20.7	-64.4	48.4	-11.03	6	>5	13.6		-14.1	7	>5	26.1
76	Arch-915R-76	TCGATACTGT	CGTATCGCCTCCCTCGCGCCATCAG-TCGATACTGT-GWGCYCCCCCGYCAATTC	0.08	-35.8	-111.03	49.3		53	62.3	79.9		0.09	-35.8	-111.1	49.1	-11.03	6	>5	13.6		-14.1	7	>5	26.1
77	Arch-915R-77	CACGTACTGT	CGTATCGCCTCCCTCGCGCCATCAG-CACGTACTGT-GWGCYCCCCCGYCAATTC	0.16	-24.9	-77.55	47.9		53	64.2	80.7		0.08	-29.3	-91	48.9	-11.03	6	>5	13.6		-14.1	7	>5	26.1
78	Arch-915R-78	TATCTGCGTA	CGTATCGCCTCCCTCGCGCCATCAG-TATCTGCGTA-GWGCYCCCCCGYCAATTC	0.08	-32.3	-100.2	49.2		53	62.3	79.8		0.08	-32.3	-100.3	49	-11.03	6	>5	13.6		-14.1	7	>5	26.1
79	Arch-915R-79	TCGACGACGA	CGTATCGCCTCCCTCGCGCCATCAG-TCGACGACGA-GWGCYCCCCCGYCAATTC	0.12	-22.7	-70.62	48.3		53	66	80.9		0.04	-30.8	-95.3	50	-11.03	6	>5	13.6		-14.1	7	>5	26.1
